# Supplementary material for: Bone mass density following developmental exposures to perfluoroalkyl substances (PFAS): a longitudinal cohort study
Source: PubMed Central journal article supplement (PMC9675242; doi:10.1186/s12940-022-00929-w), 2022-11-19
Supplement: 12940_2022_929_MOESM1_ESM.pdf [file 12940_2022_929_MOESM1_ESM.pdf]

# Supplemental Material

## Bone Mass Density following Developmental Exposures to Perfluoroalkyl Substances

Annelise Blomberg, Jann Mortensen, Pál Weihe, Philippe Grandjean

September 13, 2022

### List of Tables

|    |                                                                                                                                                                     |   |
|----|---------------------------------------------------------------------------------------------------------------------------------------------------------------------|---|
| S1 | Count of Missing Covariates . . . . .                                                                                                                               | 2 |
| S2 | Baseline covariates for mother-child pairs in the Faroe Island Cohort 5, stratified by whether or not the child completed a DXA scan at age 9. . . . .              | 2 |
| S3 | Baseline covariates of study participants, stratified by sex . . . . .                                                                                              | 3 |
| S4 | Baseline covariates of study participants, stratified by the time point of PFAS exposure measurement . . . . .                                                      | 4 |
| S5 | PFAS concentrations (ng/ml) by visit . . . . .                                                                                                                      | 5 |
| S6 | PFAS concentrations at birth (ng/ml) by study covariates . . . . .                                                                                                  | 6 |
| S7 | Estimated total association between serum PFAS concentrations and aBMD at age 9, presented as the expected difference in aBMD for a doubling in serum PFAS. . . . . | 8 |
| S8 | Estimated ADE and ACME from causal mediation models. . . . .                                                                                                        | 9 |

### List of Figures

|    |                                                                                                                                                                                                                                                                                                          |    |
|----|----------------------------------------------------------------------------------------------------------------------------------------------------------------------------------------------------------------------------------------------------------------------------------------------------------|----|
| S1 | Study selection flow chart . . . . .                                                                                                                                                                                                                                                                     | 11 |
| S2 | Distribution of serum PFAS concentrations by visit . . . . .                                                                                                                                                                                                                                             | 12 |
| S3 | Correlation of serum PFAS concentrations . . . . .                                                                                                                                                                                                                                                       | 13 |
| S4 | Associations between PFAS exposures measured at birth, 18 months, age 5 and age 9 and aBMD z-scores measured at age 9 by sex . . . . .                                                                                                                                                                   | 14 |
| S5 | Direct and total associations between PFAS exposures measured at birth, 18 months, age 5, and age 9 and aBMD z-scores measured at age 9 . . . . .                                                                                                                                                        | 14 |
| S6 | Associations between PFAS exposures measured at 18 months, and age 5 and 9 years and aBMD z-scores measured at age 9 years, with and without additional adjustment for duration of exclusive breastfeeding . . . . .                                                                                     | 15 |
| S7 | Comparison of associations between PFAS and age-, sex- and height-adjusted aBMD z-scores (primary outcome) vs. age- and sex-adjusted aBMD z-scores . . . . .                                                                                                                                             | 15 |
| S8 | Estimated thin-plate splines for significant nonlinear PFAS terms . . . . .                                                                                                                                                                                                                              | 16 |
| S9 | Mediation of the association between 18-month PFNA and PFDA concentrations and aBMD z-scores by BMI measured at age 5 years, limited to the 244 study participants who have 18-month PFAS measurements, 9-year DXA scans, complete covariate information and BMI values measured at age 5 years. . . . . | 16 |

# 1 Supplemental Tables

**Table S1:** Count of Missing Covariates

| Characteristic                 | N (%)     |
|--------------------------------|-----------|
| Total N                        | 379 (100) |
| Missing at least one covariate | 13 (3.4)  |
| Sex                            | 0 (0)     |
| Maternal education             | 9 (1.8)   |
| Maternal smoking               | 2 (0.41)  |
| Parity                         | 2 (0.41)  |
| Maternal BMI                   | 1 (0.2)   |
| Weekly physical activity       | 2 (0.41)  |

**Table S2:** Baseline covariates for mother-child pairs in the Faroe Island Cohort 5, stratified by whether or not the child completed a DXA scan at age 9.

| Characteristic              | No DXA Scan          | DXA Scan             | p-value* |
|-----------------------------|----------------------|----------------------|----------|
| n                           | 107                  | 368                  |          |
| Sex = Male (%)              | 57 (53.3)            | 190 (51.6)           | 0.850    |
| Maternal education (%)      |                      |                      | 0.047    |
| Low                         | 42 (39.3)            | 117 (31.8)           |          |
| Medium                      | 18 (16.8)            | 105 (28.5)           |          |
| High                        | 47 (43.9)            | 146 (39.7)           |          |
| Maternal smoking = No (%)   | 93 (86.9)            | 308 (83.7)           | 0.511    |
| Parity = Multiparous (%)    | 72 (67.3)            | 262 (71.2)           | 0.510    |
| Maternal BMI (median [IQR]) | 23.61 [21.67, 25.56] | 23.74 [21.11, 26.10] | 0.984    |

\* p-values are for chi-square tests with continuity correction (categorical) or Wilcoxon rank-sum tests (non-normal continuous) tests when comparing population characteristics between males and females.

**Table S3:** Baseline covariates of study participants, stratified by sex

| Characteristic               | Female       | Male         | p-value* |
|------------------------------|--------------|--------------|----------|
| n                            | 177          | 189          |          |
| Maternal education (%)       |              |              | 0.238    |
| Low                          | 64 (36.2)    | 53 (28.0)    |          |
| Medium                       | 48 (27.1)    | 55 (29.1)    |          |
| High                         | 65 (36.7)    | 81 (42.9)    |          |
| Maternal smoking = No (%)    | 145 (81.9)   | 161 (85.2)   | 0.483    |
| Parity = Multiparous (%)     | 119 (67.2)   | 143 (75.7)   | 0.095    |
| Maternal BMI (mean (SD))     | 24.10 (4.09) | 24.70 (4.82) | 0.199    |
| Weekly physical activity (%) |              |              | 0.014    |
| <=1                          | 53 (29.9)    | 33 (17.5)    |          |
| 2-3                          | 85 (48.0)    | 114 (60.3)   |          |
| >=4                          | 39 (22.0)    | 42 (22.2)    |          |

\* p-values are for chi-square tests with continuity correction (categorical) or Wilcoxon rank-sum tests (non-normal continuous) tests when comparing population characteristics between males and females.

**Table S4:** Baseline covariates of study participants, stratified by the time point of PFAS exposure measurement

| Characteristic                                | Birth        | 18 months    | 5 years      | 9 years      | p-value* |
|-----------------------------------------------|--------------|--------------|--------------|--------------|----------|
| n                                             | 359          | 276          | 289          | 344          |          |
| Sex = Male (%)                                | 185 (51.5)   | 141 (51.1)   | 148 (51.2)   | 179 (52.0)   | 0.995    |
| Maternal education (%)                        |              |              |              |              | 0.967    |
| Low                                           | 114 (31.8)   | 84 (30.4)    | 86 (29.8)    | 107 (31.1)   |          |
| Medium                                        | 100 (27.9)   | 76 (27.5)    | 75 (26.0)    | 98 (28.5)    |          |
| High                                          | 145 (40.4)   | 116 (42.0)   | 128 (44.3)   | 139 (40.4)   |          |
| Maternal smoking = No (%)                     | 301 (83.8)   | 230 (83.3)   | 241 (83.4)   | 289 (84.0)   | 0.994    |
| Parity = Multiparous (%)                      | 257 (71.6)   | 196 (71.0)   | 213 (73.7)   | 252 (73.3)   | 0.860    |
| Maternal BMI (kg/m <sup>2</sup> ) (mean (SD)) | 24.39 (4.48) | 24.60 (4.61) | 24.66 (4.61) | 24.47 (4.51) | 0.874    |
| Weekly physical activity, hours (%)           |              |              |              |              | 0.972    |
| ≤1                                            | 83 (23.1)    | 59 (21.4)    | 70 (24.2)    | 80 (23.3)    |          |
| 2-3                                           | 196 (54.6)   | 154 (55.8)   | 149 (51.6)   | 185 (53.8)   |          |
| ≥4                                            | 80 (22.3)    | 63 (22.8)    | 70 (24.2)    | 79 (23.0)    |          |

\* p-values are for chi-square tests with continuity correction (categorical) or Wilcoxon rank-sum tests (non-normal continuous) tests when comparing population characteristics between males and females.

**Table S5:** PFAS concentrations (ng/ml) by visit

| Exposure             | Birth             | 18 months          | 5 years           | 9 years           |
|----------------------|-------------------|--------------------|-------------------|-------------------|
| PFHxS (median [IQR]) | 0.17 [0.13, 0.22] | 0.23 [0.09, 0.40]  | 0.32 [0.24, 0.44] | 0.26 [0.20, 0.33] |
| PFOS (median [IQR])  | 2.87 [2.16, 4.05] | 6.89 [4.36, 10.01] | 4.71 [3.52, 6.18] | 3.10 [2.45, 4.33] |
| PFOA (median [IQR])  | 0.89 [0.62, 1.35] | 2.73 [1.92, 4.46]  | 2.22 [1.78, 2.80] | 1.43 [1.19, 1.72] |
| PFNA (median [IQR])  | 0.31 [0.25, 0.42] | 0.96 [0.63, 1.40]  | 1.12 [0.80, 1.60] | 0.63 [0.50, 0.86] |
| PFDA (median [IQR])  | 0.09 [0.07, 0.12] | 0.28 [0.21, 0.40]  | 0.33 [0.24, 0.46] | 0.23 [0.17, 0.31] |

**Table S6:** PFAS concentrations at birth (ng/ml) by study covariates

| Characteristic           | Level       | PFHxS             | PFOS              | PFOA              | PFNA              | PFDA              |
|--------------------------|-------------|-------------------|-------------------|-------------------|-------------------|-------------------|
| Sex                      | Female      | 0.17 [0.13, 0.22] | 2.84 [2.09, 3.89] | 0.92 [0.64, 1.40] | 0.32 [0.24, 0.43] | 0.09 [0.07, 0.12] |
| Sex                      | Male        | 0.18 [0.13, 0.22] | 2.93 [2.19, 4.11] | 0.88 [0.61, 1.26] | 0.31 [0.26, 0.42] | 0.10 [0.07, 0.12] |
| Sex                      | p-value*    | 0.300             | 0.300             | 0.442             | 0.565             | 0.027             |
| Maternal education       | Low         | 0.17 [0.12, 0.21] | 3.07 [2.14, 4.09] | 0.97 [0.67, 1.40] | 0.30 [0.24, 0.41] | 0.08 [0.06, 0.12] |
| Maternal education       | Medium      | 0.17 [0.13, 0.22] | 2.95 [2.23, 4.04] | 0.93 [0.68, 1.36] | 0.34 [0.25, 0.43] | 0.10 [0.07, 0.12] |
| Maternal education       | High        | 0.17 [0.13, 0.22] | 2.80 [2.01, 4.03] | 0.84 [0.55, 1.21] | 0.32 [0.25, 0.43] | 0.09 [0.07, 0.12] |
| Maternal education       | p-value*    | 0.647             | 0.422             | 0.086             | 0.238             | 0.081             |
| Maternal smoking         | Yes         | 0.20 [0.14, 0.25] | 3.11 [2.45, 4.05] | 0.96 [0.74, 1.45] | 0.31 [0.26, 0.44] | 0.10 [0.07, 0.13] |
| Maternal smoking         | No          | 0.17 [0.12, 0.22] | 2.83 [2.11, 4.04] | 0.86 [0.60, 1.30] | 0.32 [0.24, 0.42] | 0.09 [0.07, 0.12] |
| Maternal smoking         | p-value*    | 0.014             | 0.189             | 0.048             | 0.484             | 0.205             |
| Parity                   | Primiparous | 0.19 [0.15, 0.27] | 3.35 [2.44, 4.89] | 1.36 [0.97, 1.96] | 0.35 [0.28, 0.47] | 0.10 [0.07, 0.13] |
| Parity                   | Multiparous | 0.16 [0.12, 0.21] | 2.75 [2.01, 3.84] | 0.74 [0.55, 1.08] | 0.30 [0.24, 0.40] | 0.09 [0.07, 0.12] |
| Parity                   | p-value*    | <0.001            | <0.001            | <0.001            | 0.004             | 0.410             |
| Maternal BMI             | Underweight | 0.16 [0.12, 0.28] | 2.16 [1.76, 2.55] | 0.99 [0.52, 1.37] | 0.34 [0.26, 0.41] | 0.10 [0.08, 0.12] |
| Maternal BMI             | Normal      | 0.16 [0.13, 0.22] | 2.75 [2.02, 3.88] | 0.87 [0.58, 1.28] | 0.30 [0.23, 0.42] | 0.09 [0.07, 0.12] |
| Maternal BMI             | Overweight  | 0.19 [0.13, 0.23] | 3.24 [2.36, 4.30] | 0.93 [0.72, 1.31] | 0.33 [0.27, 0.42] | 0.09 [0.07, 0.12] |
| Maternal BMI             | Obese       | 0.18 [0.13, 0.24] | 3.41 [2.39, 4.81] | 0.85 [0.66, 1.38] | 0.34 [0.27, 0.54] | 0.09 [0.06, 0.13] |
| Maternal BMI             | p-value*    | 0.631             | 0.008             | 0.558             | 0.347             | 0.900             |
| Weekly physical activity | <=1         | 0.16 [0.13, 0.22] | 3.10 [2.15, 4.49] | 0.79 [0.56, 1.20] | 0.32 [0.24, 0.49] | 0.09 [0.07, 0.12] |
| Weekly physical activity | 2-3         | 0.18 [0.13, 0.22] | 2.86 [2.15, 4.04] | 0.92 [0.63, 1.38] | 0.32 [0.25, 0.42] | 0.09 [0.07, 0.12] |
| Weekly physical activity | >=4         | 0.16 [0.12, 0.21] | 2.81 [2.16, 3.70] | 0.89 [0.63, 1.32] | 0.30 [0.26, 0.39] | 0.09 [0.07, 0.12] |
| Weekly physical activity | p-value*    | 0.484             | 0.464             | 0.394             | 0.720             | 0.834             |

\* p-values are for Wilcoxon rank-sum tests (non-normal continuous) comparing PFAS distributions between population subgroups.

**Table S7:** Estimated total association between serum PFAS concentrations and aBMD at age 9, presented as the expected difference in aBMD for a doubling in serum PFAS.

| Exposure         | Effect Estimate (95% CI) | p-value |
|------------------|--------------------------|---------|
| PFHxS, birth     | 0.1 (-0.017, 0.22)       | 0.091   |
| PFOS, birth      | 0.015 (-0.1, 0.13)       | 0.8     |
| PFOA, birth      | 0.026 (-0.078, 0.13)     | 0.63    |
| PFNA, birth      | -0.055 (-0.19, 0.079)    | 0.42    |
| PFDA, birth      | -0.049 (-0.19, 0.097)    | 0.51    |
| PFHxS, 18 months | 0.008 (-0.044, 0.06)     | 0.76    |
| PFOS, 18 months  | -0.044 (-0.15, 0.067)    | 0.44    |
| PFOA, 18 months  | -0.066 (-0.17, 0.04)     | 0.22    |
| PFNA, 18 months  | -0.09 (-0.2, 0.018)      | 0.1     |
| PFDA, 18 months  | -0.082 (-0.22, 0.053)    | 0.23    |
| PFHxS, 5 years   | -0.012 (-0.14, 0.11)     | 0.85    |
| PFOS, 5 years    | -0.1 (-0.26, 0.048)      | 0.18    |
| PFOA, 5 years    | -0.16 (-0.33, 0.0086)    | 0.063   |
| PFNA, 5 years    | -0.15 (-0.26, -0.039)    | < 0.01  |
| PFDA, 5 years    | -0.07 (-0.17, 0.034)     | 0.19    |
| PFHxS, 9 years   | 0.0037 (-0.15, 0.16)     | 0.96    |
| PFOS, 9 years    | -0.056 (-0.19, 0.075)    | 0.4     |
| PFOA, 9 years    | -0.14 (-0.36, 0.071)     | 0.19    |
| PFNA, 9 years    | -0.035 (-0.18, 0.11)     | 0.63    |
| PFDA, 9 years    | -0.012 (-0.15, 0.12)     | 0.86    |



**Table S8:** Estimated ADE and ACME from causal mediation models.

| Exposure        | Mediator          | Effect         | Effect Estimate (95% CI) | p-value |
|-----------------|-------------------|----------------|--------------------------|---------|
| PFOS, 18 months | Total Fat Mass    | ACME           | -0.1 (-0.19, -0.023)     | < 0.01  |
| PFOS, 18 months | Total Fat Mass    | ADE            | 0.063 (-0.078, 0.21)     | 0.4     |
| PFOS, 18 months | Total Fat Mass    | Total Effect   | -0.038 (-0.21, 0.14)     | 0.73    |
| PFOS, 18 months | Total Fat Mass    | Prop. Mediated | 2.7 (-13, 14)            | 0.72    |
| PFOA, 18 months | Total Fat Mass    | ACME           | -0.1 (-0.19, -0.029)     | 0.012   |
| PFOA, 18 months | Total Fat Mass    | ADE            | 0.0066 (-0.13, 0.15)     | 0.87    |
| PFOA, 18 months | Total Fat Mass    | Total Effect   | -0.097 (-0.25, 0.072)    | 0.27    |
| PFOA, 18 months | Total Fat Mass    | Prop. Mediated | 1.1 (-6.1, 11)           | 0.26    |
| PFOA, 18 months | BMI               | ACME           | -0.1 (-0.19, -0.0069)    | 0.038   |
| PFOA, 18 months | BMI               | ADE            | 0.0044 (-0.13, 0.13)     | 0.93    |
| PFOA, 18 months | BMI               | Total Effect   | -0.096 (-0.25, 0.057)    | 0.28    |
| PFOA, 18 months | BMI               | Prop. Mediated | 1 (-6, 6.2)              | 0.26    |
| PFOA, 5 years   | Total Fat Mass    | ACME           | -0.2 (-0.34, -0.064)     | < 0.01  |
| PFOA, 5 years   | Total Fat Mass    | ADE            | -0.037 (-0.28, 0.22)     | 0.79    |
| PFOA, 5 years   | Total Fat Mass    | Total Effect   | -0.23 (-0.49, 0.046)     | 0.12    |
| PFOA, 5 years   | Total Fat Mass    | Prop. Mediated | 0.84 (-4, 4.2)           | 0.12    |
| PFOA, 5 years   | BMI               | ACME           | -0.21 (-0.37, -0.064)    | < 0.01  |
| PFOA, 5 years   | BMI               | ADE            | -0.022 (-0.23, 0.2)      | 0.82    |
| PFOA, 5 years   | BMI               | Total Effect   | -0.23 (-0.49, 0.05)      | 0.098   |
| PFOA, 5 years   | BMI               | Prop. Mediated | 0.91 (-1.6, 5.4)         | 0.09    |
| PFNA, 18 months | Total Fat Mass    | ACME           | -0.13 (-0.21, -0.051)    | < 0.01  |
| PFNA, 18 months | Total Fat Mass    | ADE            | 0.014 (-0.14, 0.16)      | 0.83    |
| PFNA, 18 months | Total Fat Mass    | Total Effect   | -0.11 (-0.28, 0.055)     | 0.19    |
| PFNA, 18 months | Total Fat Mass    | Prop. Mediated | 1.1 (-5.8, 7.7)          | 0.19    |
| PFNA, 18 months | BMI               | ACME           | -0.13 (-0.23, -0.044)    | < 0.01  |
| PFNA, 18 months | BMI               | ADE            | 0.011 (-0.11, 0.15)      | 0.86    |
| PFNA, 18 months | BMI               | Total Effect   | -0.12 (-0.29, 0.048)     | 0.16    |
| PFNA, 18 months | BMI               | Prop. Mediated | 1.1 (-6.5, 11)           | 0.16    |
| PFNA, 18 months | BMI (age 5 years) | ACME           | -0.096 (-0.18, -0.019)   | < 0.01  |
| PFNA, 18 months | BMI (age 5 years) | ADE            | -0.1 (-0.23, 0.043)      | 0.16    |
| PFNA, 18 months | BMI (age 5 years) | Total Effect   | -0.2 (-0.36, -0.027)     | 0.024   |
| PFNA, 18 months | BMI (age 5 years) | Prop. Mediated | 0.49 (0.11, 1.6)         | 0.032   |
| PFDA, 18 months | Total Fat Mass    | ACME           | -0.16 (-0.26, -0.066)    | < 0.01  |

| Exposure        | Mediator          | Effect         | Effect Estimate (95% CI) | p-value |
|-----------------|-------------------|----------------|--------------------------|---------|
| PFDA, 18 months | Total Fat Mass    | ADE            | 0.038 (-0.17, 0.23)      | 0.68    |
| PFDA, 18 months | Total Fat Mass    | Total Effect   | -0.12 (-0.33, 0.1)       | 0.32    |
| PFDA, 18 months | Total Fat Mass    | Prop. Mediated | 1.3 (-10, 11)            | 0.31    |
| PFDA, 18 months | BMI               | ACME           | -0.15 (-0.27, -0.032)    | 0.01    |
| PFDA, 18 months | BMI               | ADE            | 0.032 (-0.15, 0.21)      | 0.76    |
| PFDA, 18 months | BMI               | Total Effect   | -0.12 (-0.35, 0.1)       | 0.32    |
| PFDA, 18 months | BMI               | Prop. Mediated | 1.3 (-9.7, 8.2)          | 0.31    |
| PFDA, 18 months | BMI (age 5 years) | ACME           | -0.12 (-0.21, -0.018)    | 0.022   |
| PFDA, 18 months | BMI (age 5 years) | ADE            | -0.077 (-0.25, 0.12)     | 0.45    |
| PFDA, 18 months | BMI (age 5 years) | Total Effect   | -0.19 (-0.4, 0.049)      | 0.11    |
| PFDA, 18 months | BMI (age 5 years) | Prop. Mediated | 0.6 (-1.5, 2.6)          | 0.12    |

## 2 Supplemental Figures

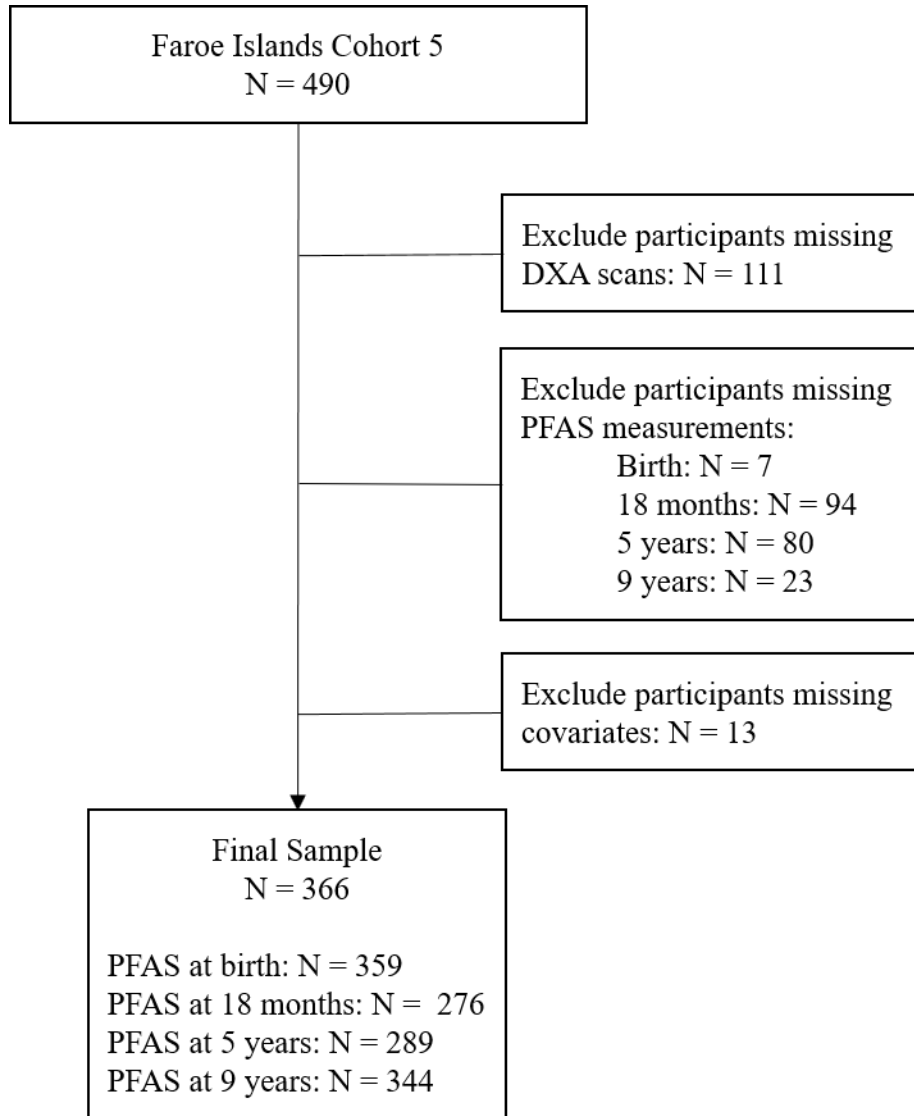

Figure S1: Study selection flow chart

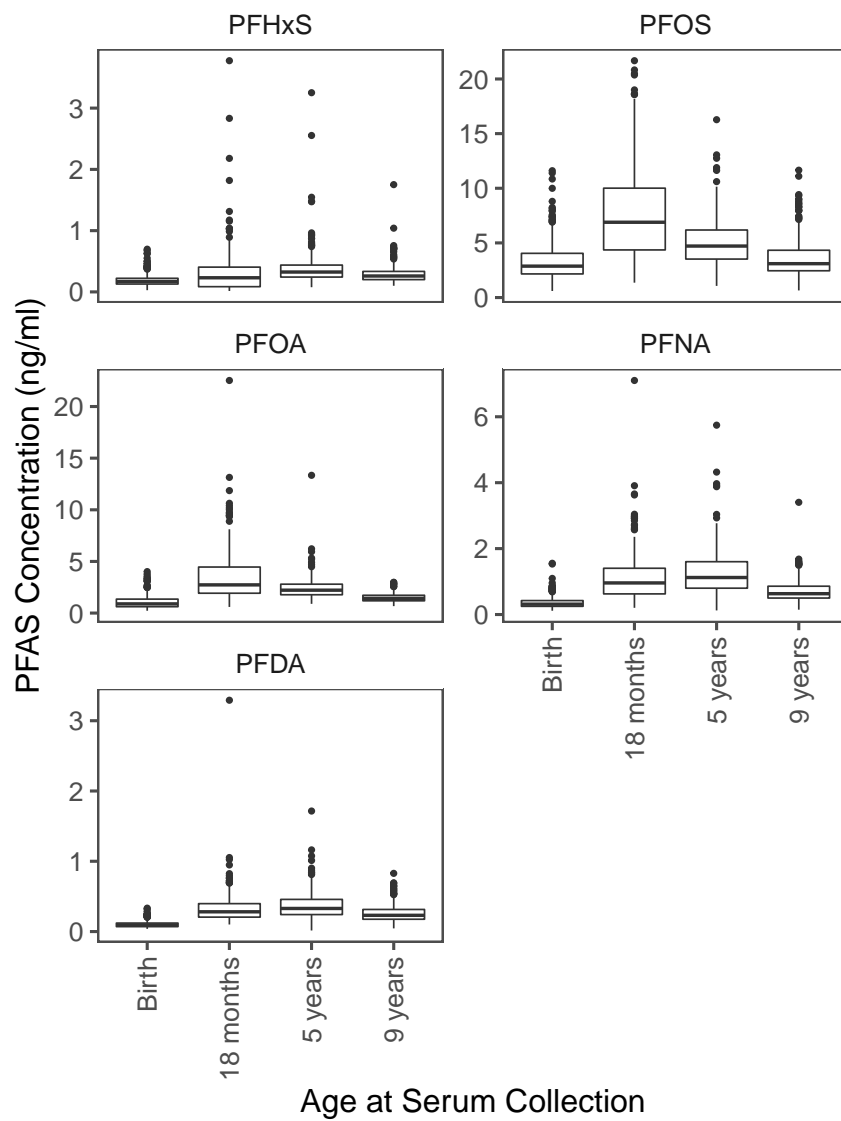

Figure S2: Distribution of serum PFAS concentrations by visit

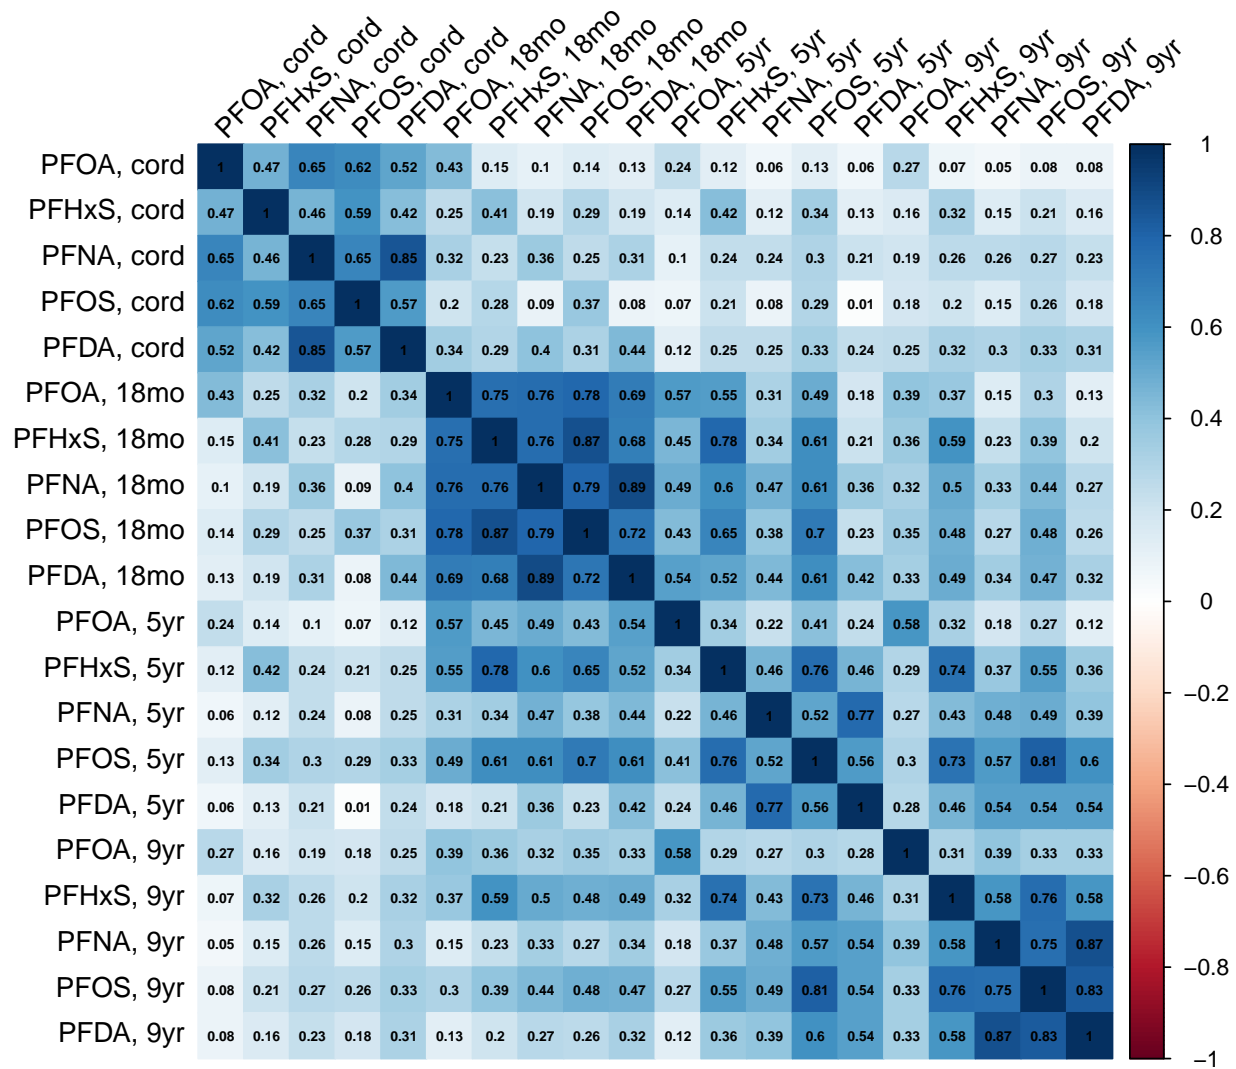

Figure S3: Correlation of serum PFAS concentrations

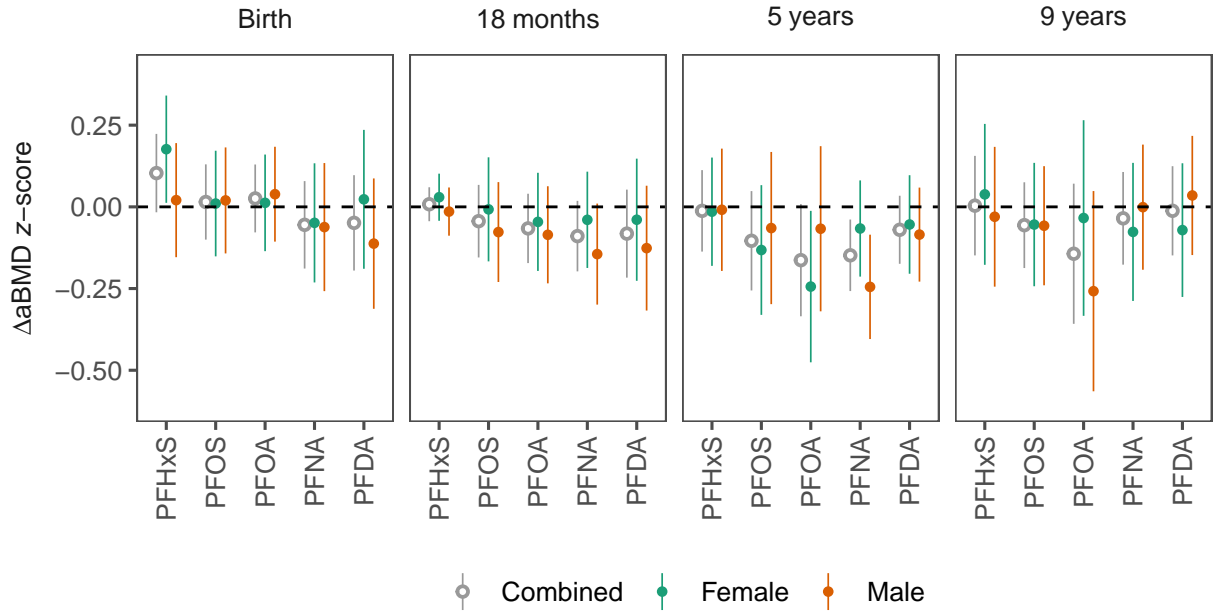

**Figure S4:** Associations between PFAS exposures measured at birth, 18 months, age 5 and age 9 and aBMD z-scores measured at age 9 by sex

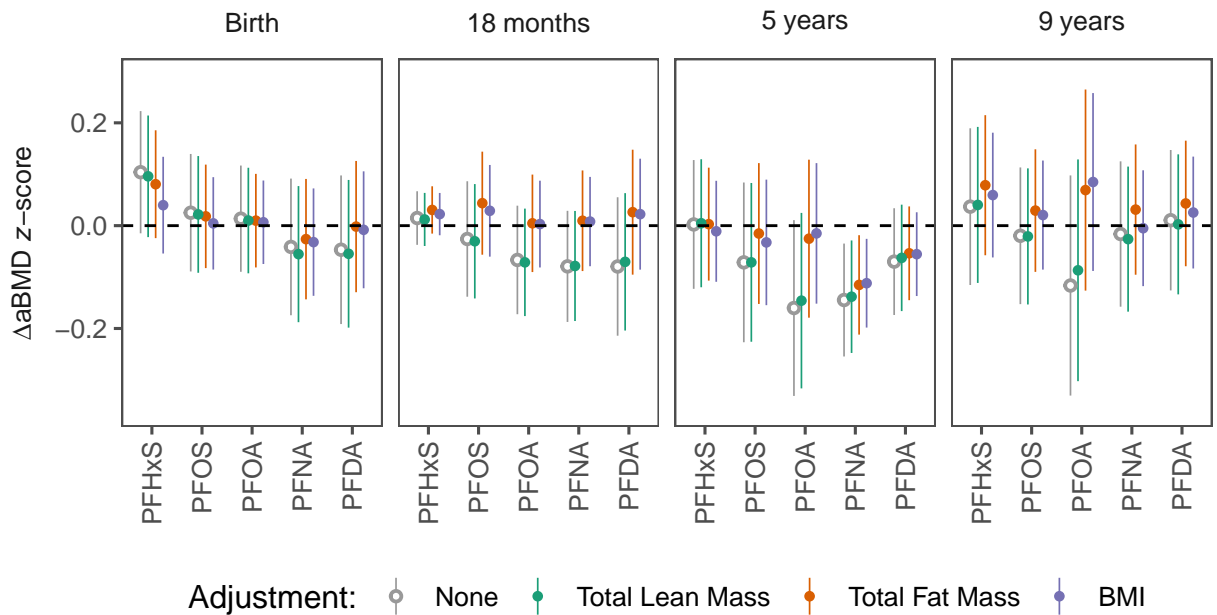

**Figure S5:** Direct and total associations between PFAS exposures measured at birth, 18 months, age 5, and age 9 and aBMD z-scores measured at age 9

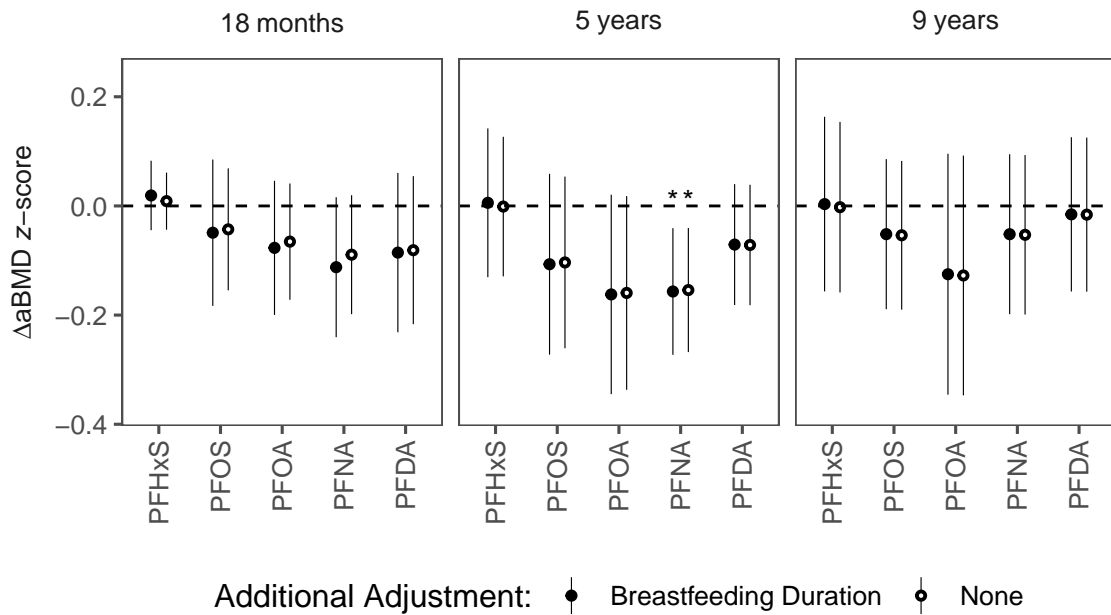

**Figure S6:** Associations between PFAS exposures measured at 18 months, and age 5 and 9 years and aBMD z-scores measured at age 9 years, with and without additional adjustment for duration of exclusive breastfeeding

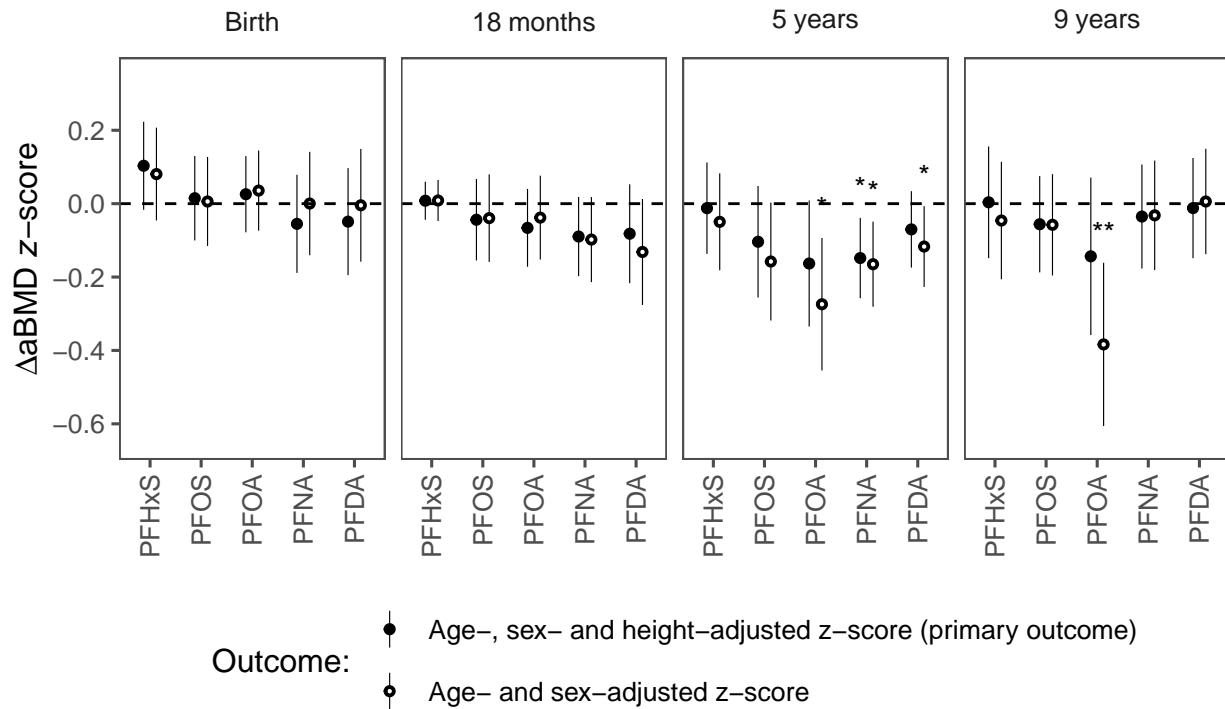

**Figure S7:** Comparison of associations between PFAS and age-, sex- and height-adjusted aBMD z-scores (primary outcome) vs. age- and sex-adjusted aBMD z-scores

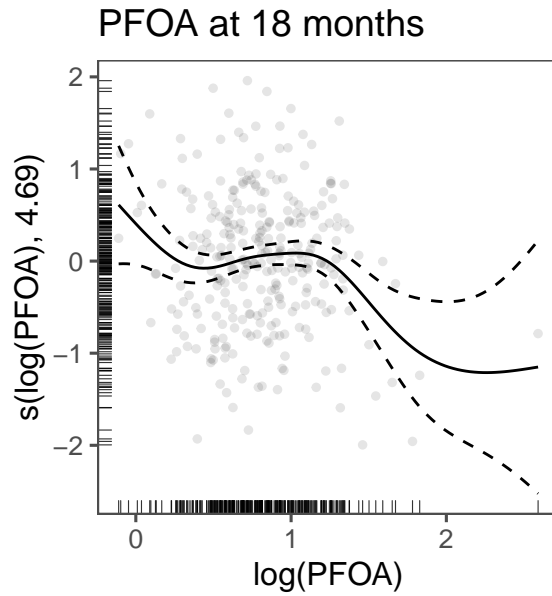

**Figure S8:** Estimated thin-plate splines for significant nonlinear PFAS terms

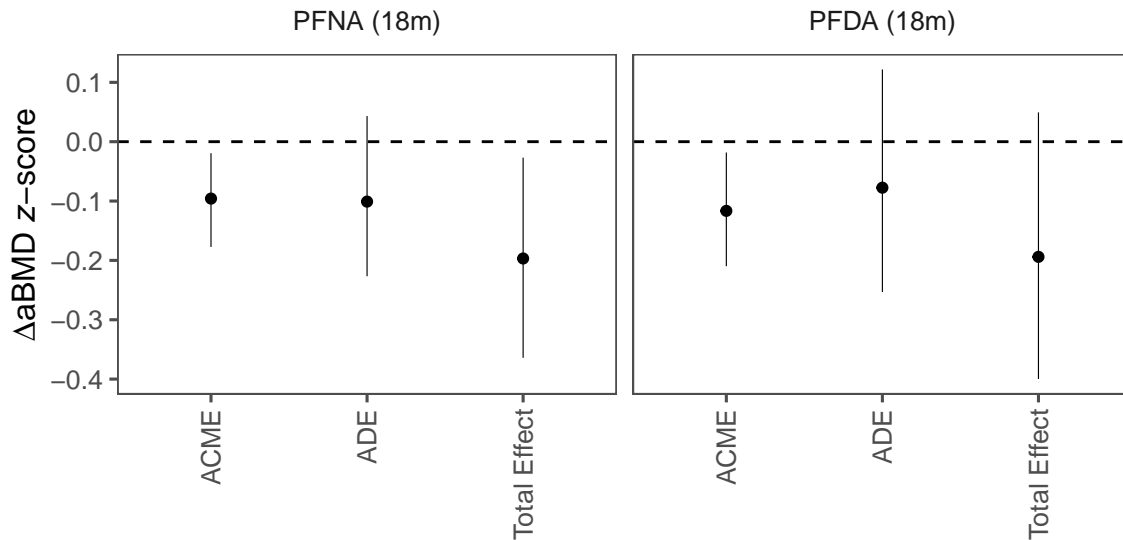

**Figure S9:** Mediation of the association between 18-month PFNA and PFDA concentrations and aBMD z-scores by BMI measured at age 5 years, limited to the 244 study participants who have 18-month PFAS measurements, 9-year DXA scans, complete covariate information and BMI values measured at age 5 years.
